# Supplementary material for: Phylogenetic conservatism in skulls and evolutionary lability in limbs – morphological evolution across an ancient frog radiation is shaped by diet, locomotion and burrowing
Source: PubMed Central journal article supplement (PMC5504843; doi:10.1186/s12862-017-0993-0), 2017-07-10

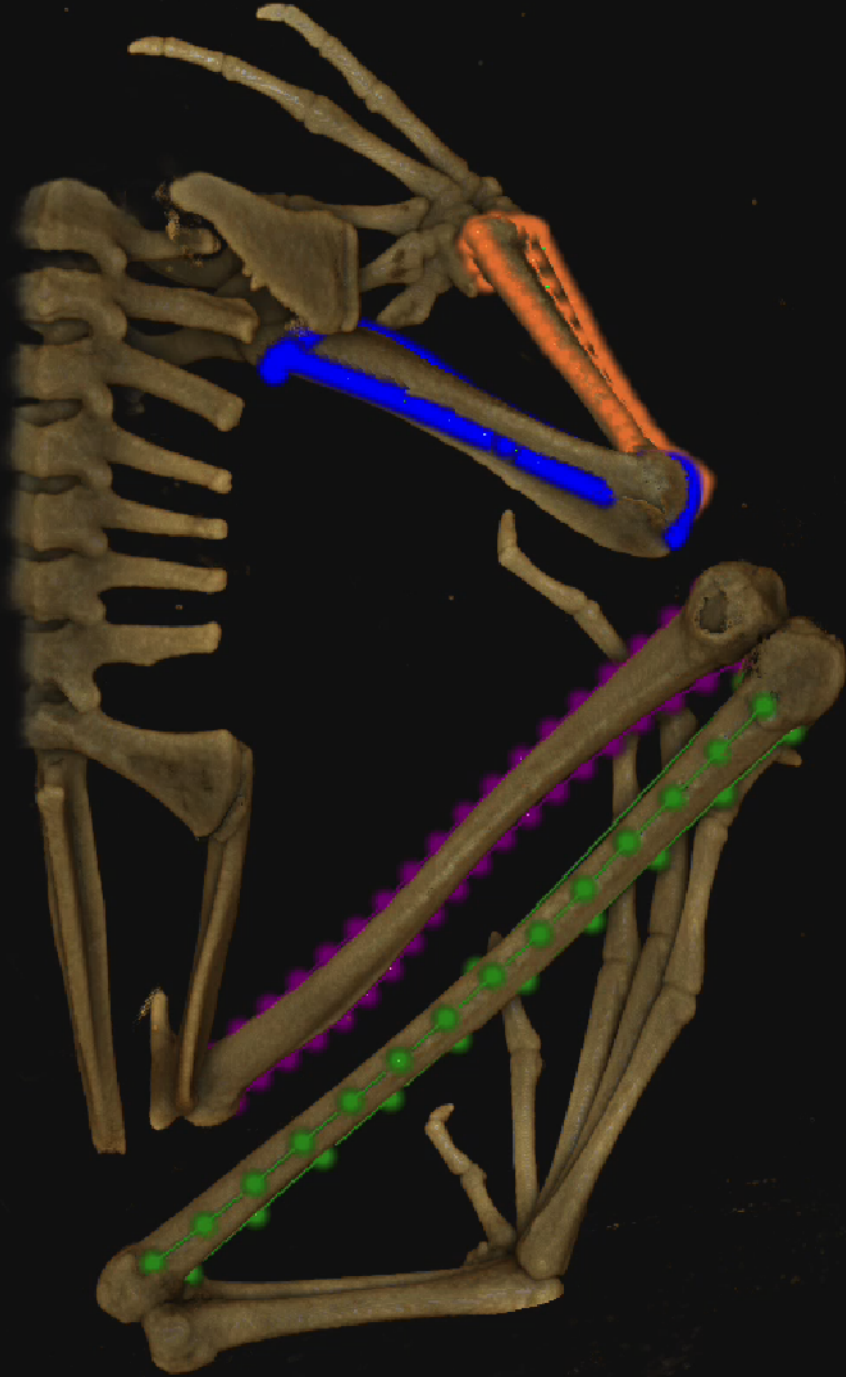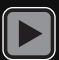

Supplement: 12862_2017_993_MOESM3_ESM.pdf [file 12862_2017_993_MOESM3_ESM.pdf]
